# Supplementary material
Source: PubMed Central journal article supplement (PMC263775)
Supplement: pnas_100_23_13264__1.pdf [file pnas_100_23_13264__1.pdf]

**Table 4.** Matrix of the DOT solutions that satisfied the 10 Å C $\alpha$  and 7 Å heavy atom distance constraint filters clustered according to similarity.

| Rank   | Energy | 1     | 2     | 3     | 5     | 8     | 9     | 10    | 13    | 4     | 7     | 11    | 12    | 6     | 14    | 15    |
|--------|--------|-------|-------|-------|-------|-------|-------|-------|-------|-------|-------|-------|-------|-------|-------|-------|
| Energy |        | -14.7 | -12.2 | -12.0 | -11.8 | -11.7 | -11.6 | -11.4 | -11.0 | -12.0 | -11.7 | -11.4 | -11.1 | -11.8 | -10.9 | -10.9 |
| 1      | -14.7  | 0     | 1.7   | 1.4   | 3.3   | 4     | 2.4   | 7.6   | 9.2   | 17.2  | 16.5  | 30.1  | 31.3  | 32.5  | 37.7  | 30.2  |
| 2      | -12.2  | 8.4   | 0     | 1     | 2     | 3.3   | 1     | 6.4   | 9.1   | 16.9  | 15.9  | 29.6  | 30.9  | 32.3  | 37.4  | 29.7  |
| 3      | -12.0  | 8.1   | 10.1  | 0     | 2.2   | 4.2   | 2     | 7.3   | 9.9   | 16.6  | 15.8  | 29.7  | 30.9  | 32.1  | 37.5  | 30.2  |
| 5      | -11.8  | 7.4   | 6.0   | 7.4   | 0     | 4.4   | 2.2   | 6.1   | 9.9   | 15.2  | 14.1  | 27.9  | 29.2  | 30.6  | 35.8  | 28.7  |
| 8      | -11.7  | 10.5  | 12.0  | 8.9   | 6.0   | 0     | 2.4   | 4.2   | 6     | 18.6  | 17.2  | 30.0  | 31.4  | 33.6  | 37.3  | 28.4  |
| 9      | -11.6  | 7.4   | 6.0   | 7.4   | 0     | 6.0   | 0     | 5.5   | 8.4   | 17.2  | 16.1  | 29.5  | 30.9  | 32.6  | 37.2  | 29.3  |
| 10     | -11.4  | 19.8  | 16.2  | 19.2  | 13.1  | 12.3  | 13.1  | 0     | 6.5   | 76.1  | 15.8  | 27.6  | 29.3  | 32.3  | 34.5  | 25.4  |
| 13     | -12.0  | 36.0  | 41.1  | 33.9  | 35.2  | 29.3  | 35.2  | 35.5  | 0     | 21.7  | 20.1  | 30.8  | 32.4  | 35.6  | 36.8  | 26.0  |
| 4      | -12.0  | 70.5  | 65.2  | 72.3  | 71.2  | 77.1  | 71.2  | 76.1  | 106   | 0     | 3.2   | 15.3  | 15.8  | 15.6  | 24.2  | 23.7  |
| 7      | -11.7  | 62.8  | 56.6  | 64.4  | 62.5  | 68.4  | 62.5  | 66.0  | 97.6  | 12.2  | 0     | 14.8  | 15.7  | 16.9  | 23.9  | 22.0  |
| 11     | -11.4  | 118   | 112   | 120   | 117   | 123   | 117   | 119   | 152   | 49.8  | 55.4  | 0     | 2.4   | 10.2  | 10.0  | 16.2  |
| 12     | -11.1  | 120   | 114   | 122   | 120   | 16    | 120   | 122   | 155   | 50.5  | 57.7  | 8.1   | 0     | 8.1   | 9.6   | 17.9  |
| 6      | -11.8  | 118   | 114   | 121   | 120   | 126   | 112   | 125   | 154   | 49.6  | 59.8  | 26.8  | 19.2  | 0     | 15.8  | 25.3  |
| 14     | -10.9  | 157   | 152   | 160   | 158   | 164   | 158   | 162   | 167   | 87.6  | 96.8  | 46.7  | 41.0  | 38.8  | 0     | 15.3  |
| 15     | -10.9  | 170   | 165   | 173   | 171   | 177   | 171   | 175   | 154   | 10    | 110   | 58.7  | 53.7  | 52.7  | 14.7  | 0     |

The data in the table to the upper right of the diagonal is the distance between the center of mass of each of the solutions. The lower left triangle shows the smallest angle that would allow overlap of the different structures when the centers of coordinates are superimposed. Solutions 1, 2, 3, 5, 8, and 9 formed a large cluster of highly similar structures. Solutions 10 and 13 were somewhat more divergent but were still close to the overall orientation of this first cluster. Solutions 4, 7, 11, 12, 6, 14, and 15 had angles of rotation that were substantially different.
